# Supplementary material for: Autoantibody repertoire characterization provides insight into the pathogenesis of monogenic and polygenic autoimmune diseases
Source: PubMed Central journal article supplement (PMC9955420; doi:10.3389/fimmu.2023.1106537), 2023-02-10

Supplemental Figure 1. Markers of B cell activation and expansion

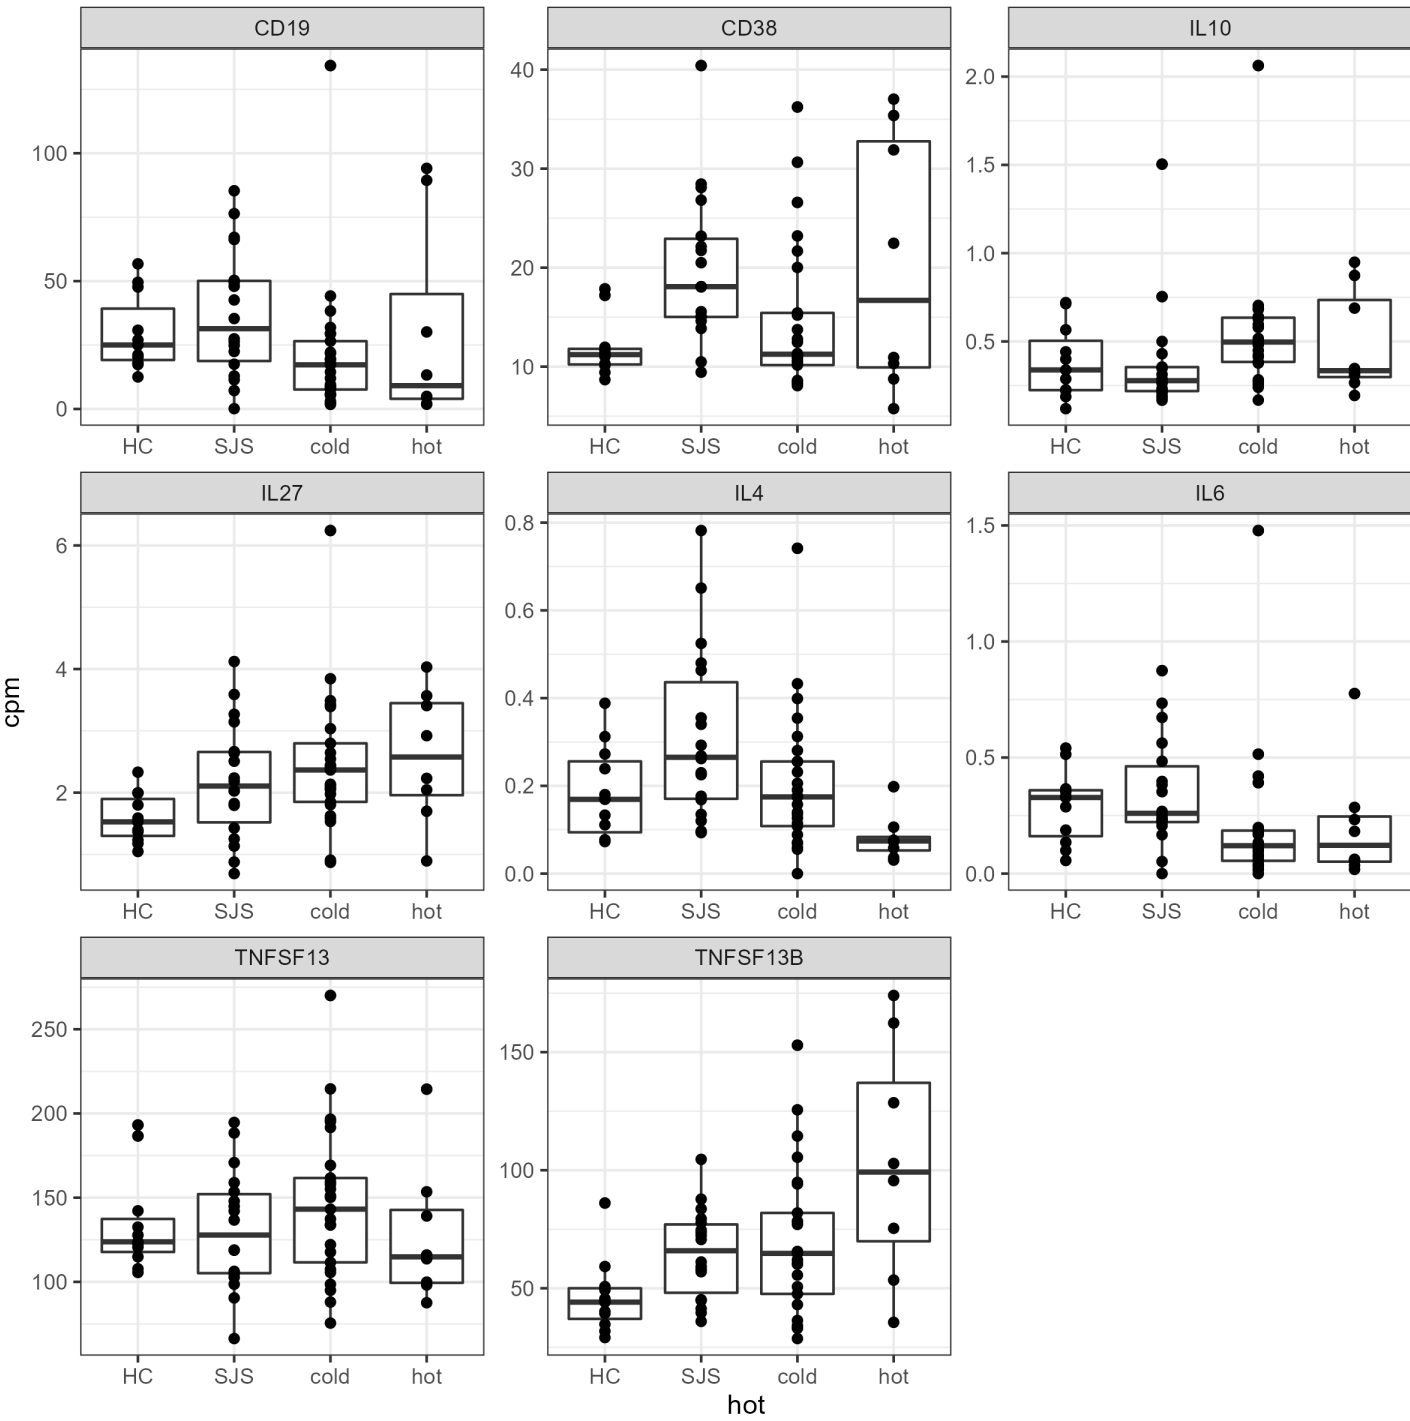

**Supplemental Figure 2.** Mutations detected per VH gene domain. The number of mutations for each region of the VH gene were determined. Graphs show the mean  $\pm$  SEM for all the subjects in each group.

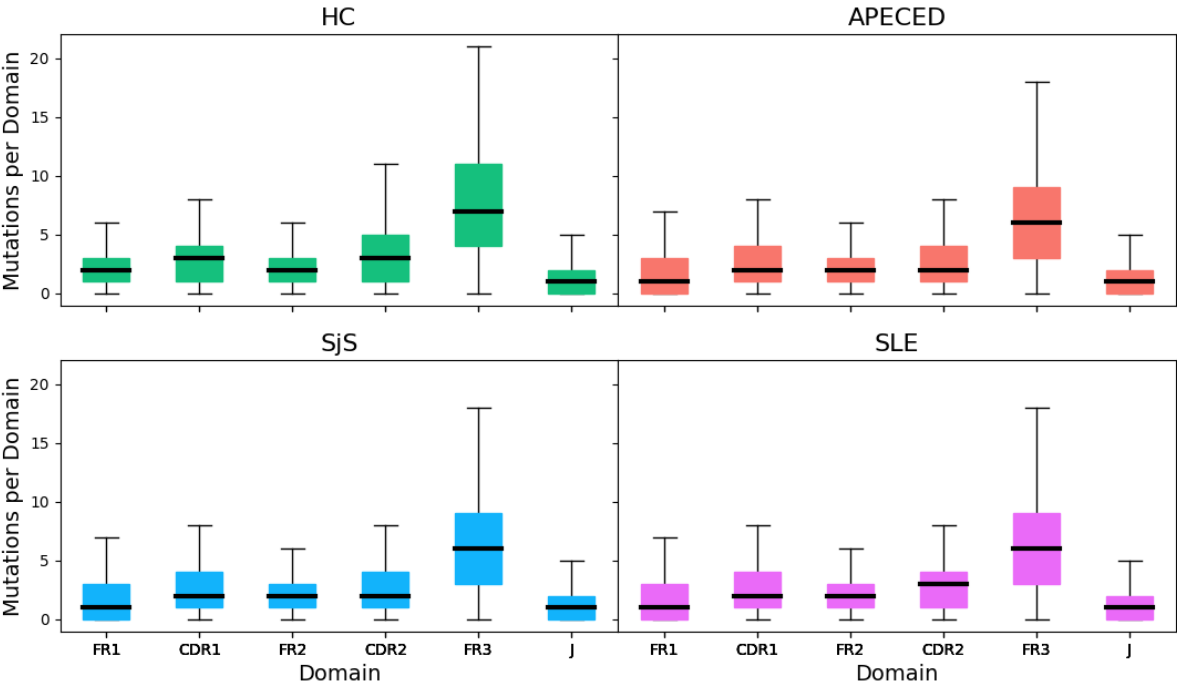

**Supplemental Figure 3.** Memory B cell isolation. Switched memory B cells were isolated using Miltenyi MACS beads and flow cytometry was used to confirm their purity.

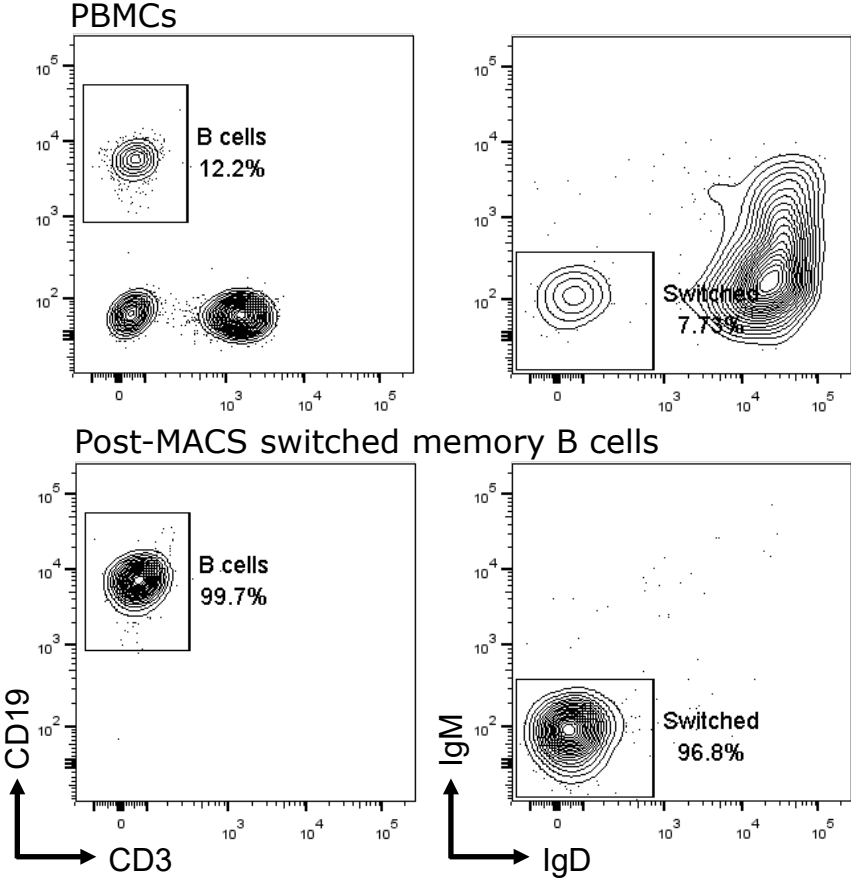

Supplement: DataSheet_1.pdf [file DataSheet_1.pdf]
